# Supplementary material for: KRASG12C-independent feedback activation of wild-type RAS constrains KRASG12C inhibitor efficacy
Source: PubMed Central journal article supplement — Cell Rep. Author manuscript; Available in PMC 2023 Jan 3. (PMC9809542; doi:10.1016/j.celrep.2022.110993), 2022-06-21
Supplement: NIHMS1818170-supplement-1.pdf [file NIHMS1818170-supplement-1.pdf]

**Supplemental information**

**KRAS<sup>G12C</sup>-independent feedback**

**activation of wild-type RAS constrains**

**KRAS<sup>G12C</sup> inhibitor efficacy**

**Meagan B. Ryan, Oluwadara Coker, Alexey Sorokin, Katerina Fella, Haley Barnes, Edmond Wong, Preeti Kanikarla, Fengqin Gao, Youyan Zhang, Lian Zhou, Scott Kopetz, and Ryan B. Corcoran**

# Supplemental Figure 1 (Related to Fig 1 and 2)

**A**

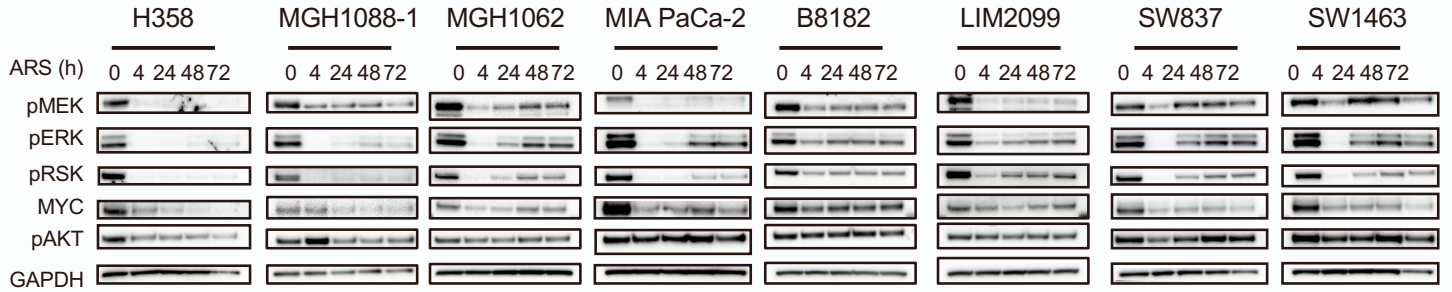

**B**

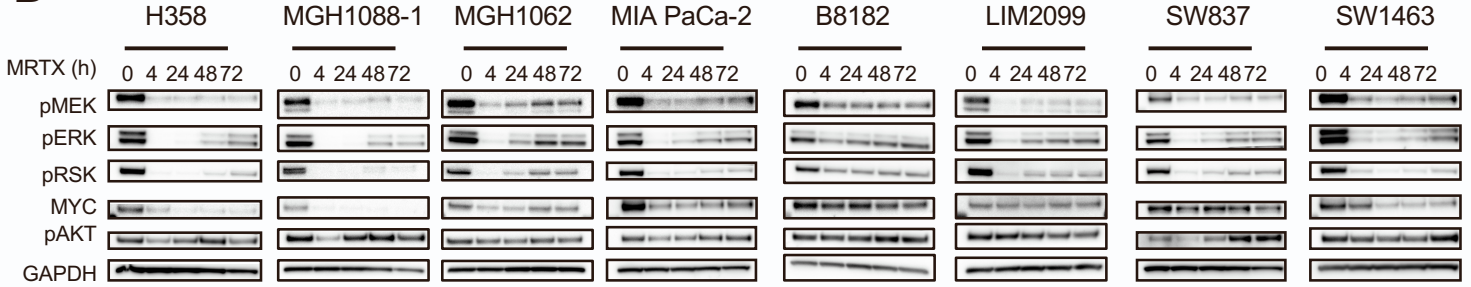

**C**

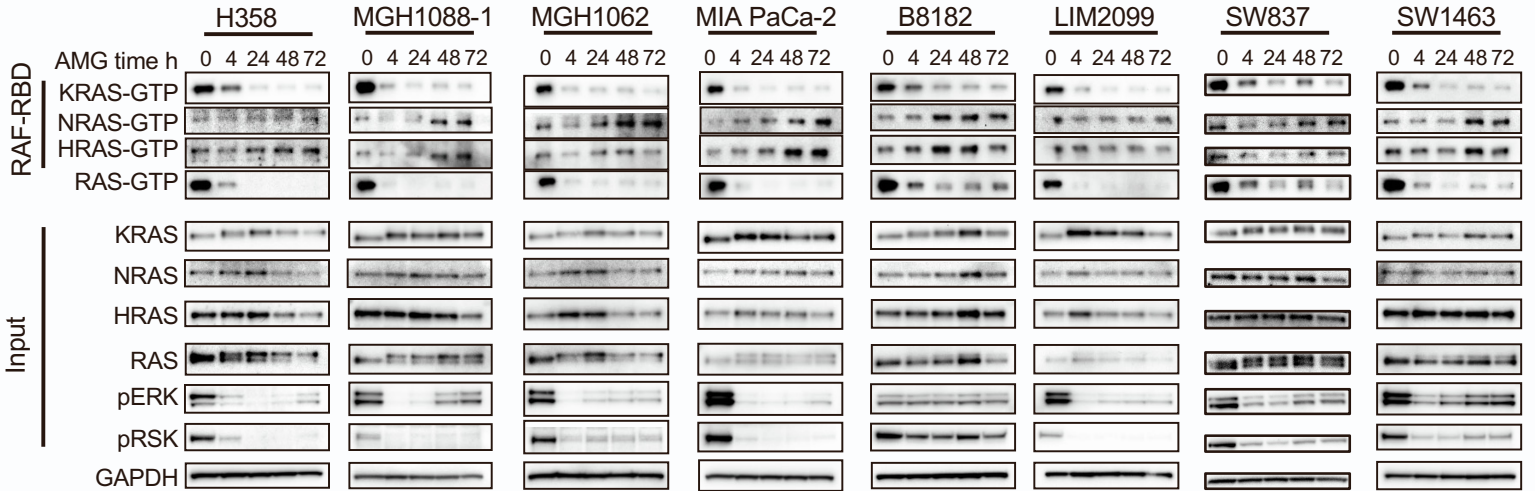

**D**

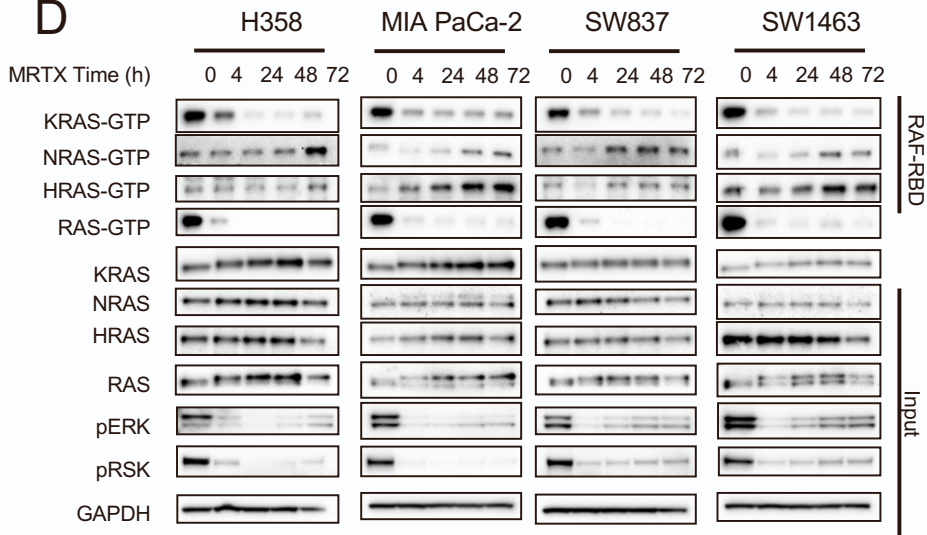

**Supplemental Figure 1 KRAS<sup>G12C</sup> inactive GDP state inhibitors are prone to adaptive feedback reactivation of the MAPK pathway, related to Figures 1 and 2** (A, B) KRAS-<sup>G12C</sup> mutant cell lines were treated with (A) ARS-1620(10 μM) or (B) MRTX849 (100 nM) for 0, 4, 24, 48, and 72 h. Blot analysis was performed for phospho- (p)MEK, pERK, pRSK, pAKT, and total MYC with GAPDH as a loading control C) Cell lines were treated with AMG 510 (100 nM) for 0, 4, 24, 48, and 72 h and lysates were subject to a RAF-RBD pulldown and blot analysis of KRAS, NRAS, HRAS and total RAS as well as pERK, pRSK and GAPDH for input samples D) Cell lines were treated with MRTX849 (100 nM) for 0, 4, 24, 48, and 72 h and lysates were subject to a RAF-RBD pulldown and blot analysis of KRAS, NRAS, HRAS and total RAS as well as pERK, pRSK and GAPDH for input samples



**Supplemental Figure 2 Vertical combination strategies abrogate adaptive response to KRAS<sup>G12C</sup> inhibitors in NSCLC and CRC, Related to Figure 3** (A) SW1463 or H358 cells were treated with AMG 510 (100 nM) or RM-018 (100 nM) alone or in combination with the SHP2 inhibitor RMC-4550 for 4, 24, 48, or 72 h and lysates were subject to a RAF-RBD pulldown and blot analysis of KRAS, NRAS, HRAS and total RAS as well as pERK, pRSK and GAPDH for input samples (B) SW1463, MIA PaCa-2 and H358 cell lines were treated with RM-018 (100 nM) alone or in combination with the SHP2 inhibitor RMC-4550 (1  $\mu$ M) for 0, 4, 24, 48, and 72 h. Blot analysis was performed for phospho- (p)MEK, pERK, pRSK, pAKT, and total MYC with GAPDH as a loading control (C) SW1463, MIA PaCa-2 and H358 cell lines were treated with AMG 510 (100 nM) alone or in combination with the EGFR mAb panitumumab (30ug/mL), RMC-4550 (1 uM), or the MEK inhibitor trametinib (10 nM) for 4 h or 7 d and lysates were subject to a RAF-RBD pulldown and blot analysis of KRAS, NRAS, HRAS and total RAS as well as pERK, pRSK and GAPDH for input samples. (D, E) Indicated cell lines were treated with AMG 510 (100 nM) alone or in combination with the panitumumab (30ug/mL), RMC-4550 (1 uM), or trametinib (10 nM) for 0, 24, 48, and 72 h. Blot analysis was performed for phospho- (p)MEK, pERK, pRSK, pAKT, and total MYC with GAPDH as a loading control

# Supplemental Figure 3 (Related to Figure 3)

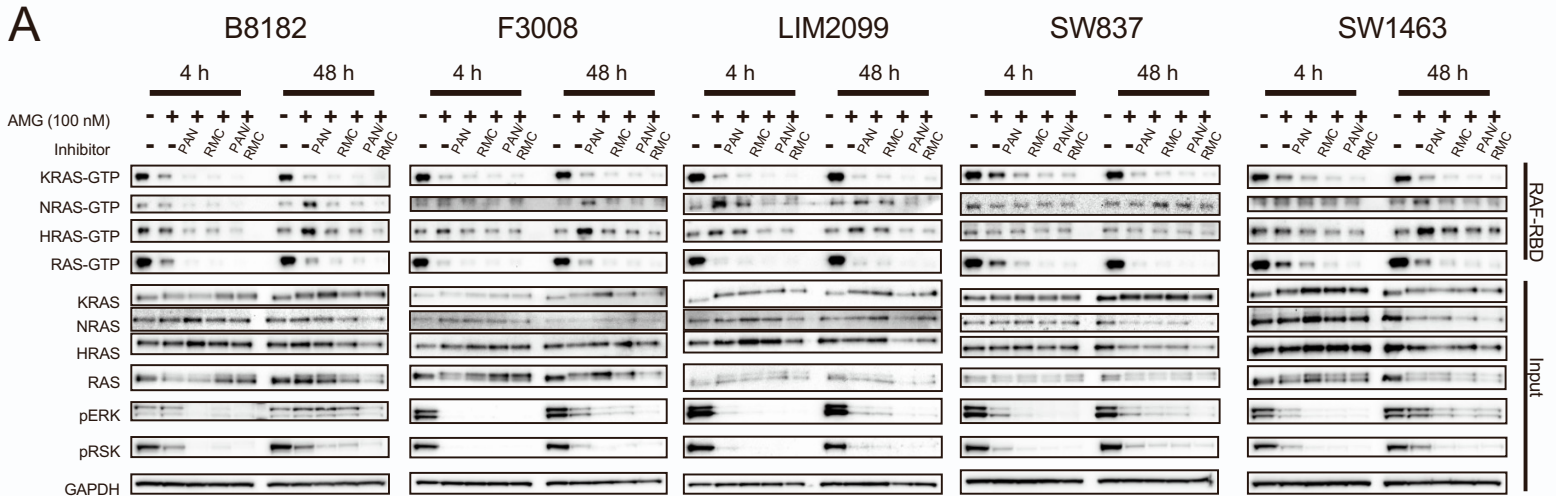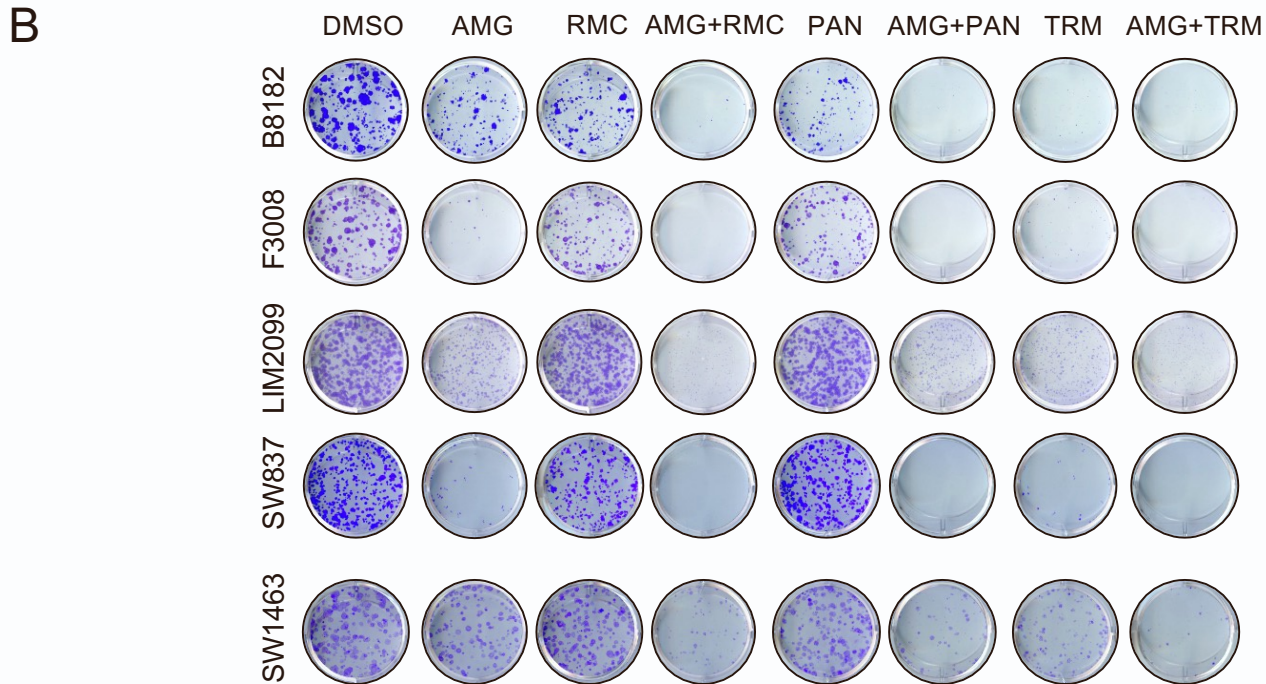

**Supplemental Figure 3, Vertical combination strategies overcome adaptive feedback reactivation of RAS MAPK signaling in CRC, Related to Figure 3** (A) B8182, F3008, LIM2099, SW837, and SW1463 cell lines were treated with AMG 510 (100 nM) alone or in combination with the EGFR mAb panitumumab (30ug/mL), the SHP2 inhibitor RMC-4550 (1 uM), or the MEK inhibitor trametinib (10 nM) for 4 or 48 h and lysates were subject to a RAF-RBD pulldown and blot analysis of KRAS, NRAS, HRAS and total RAS as well as pERK, pRSK and GAPDH for input samples. (B) B8182, F3008, LIM2099, SW837, and SW1463 cell lines were treated with AMG 510 (100 nM) alone or in combination with the panitumumab (30ug/mL), RMC-4550 (1 uM), trametinib (10 nM) for 14 days and then stained with crystal violet.



# Supplemental Figure 4 (Related to figure 4 and 5)

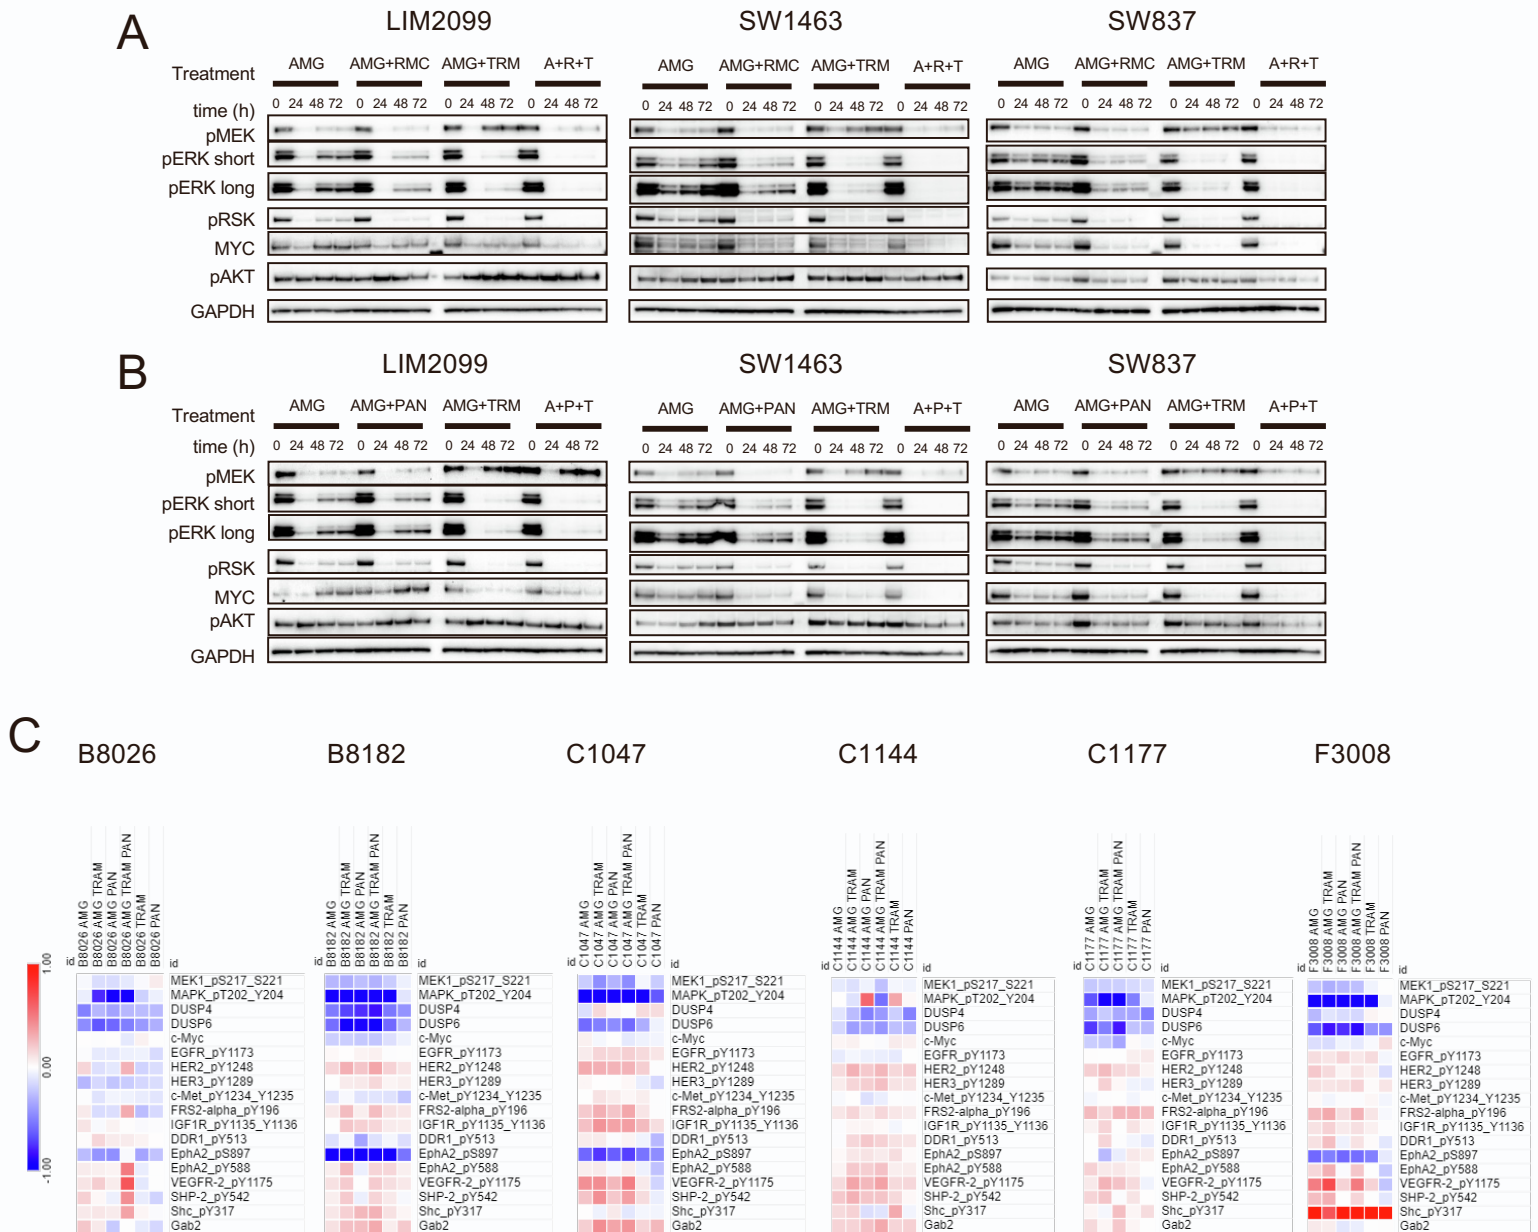

**Supplemental Figure 4 EGFR and MEK Doublet and Triplet combination strategies enhance the efficacy of KRAS<sup>G12C</sup> inhibition in CRC *in vitro* and *in vivo*, related to Figures 4 and 5 (A,B) LIM2099, SW837, and SW1463 cell lines were treated with AMG 510 alone or in combination with panitumumab or RMC-4550, or trametinib for 24, 48, and 72 h. Blot analysis was performed for phospho- (p)MEK, pERK, pRSK, pAKT, and total MYC with GAPDH as a loading control (C) RPPA analysis of KRAS<sup>G12C</sup> CRC PDX tumors treated with AMG 510 (100 mg/kg), panitumumab (0.5 mg) or trametinib (1 mg/kg) alone or in combination for 3 d**

# Supplemental Figure 5 (Related to figure 5)

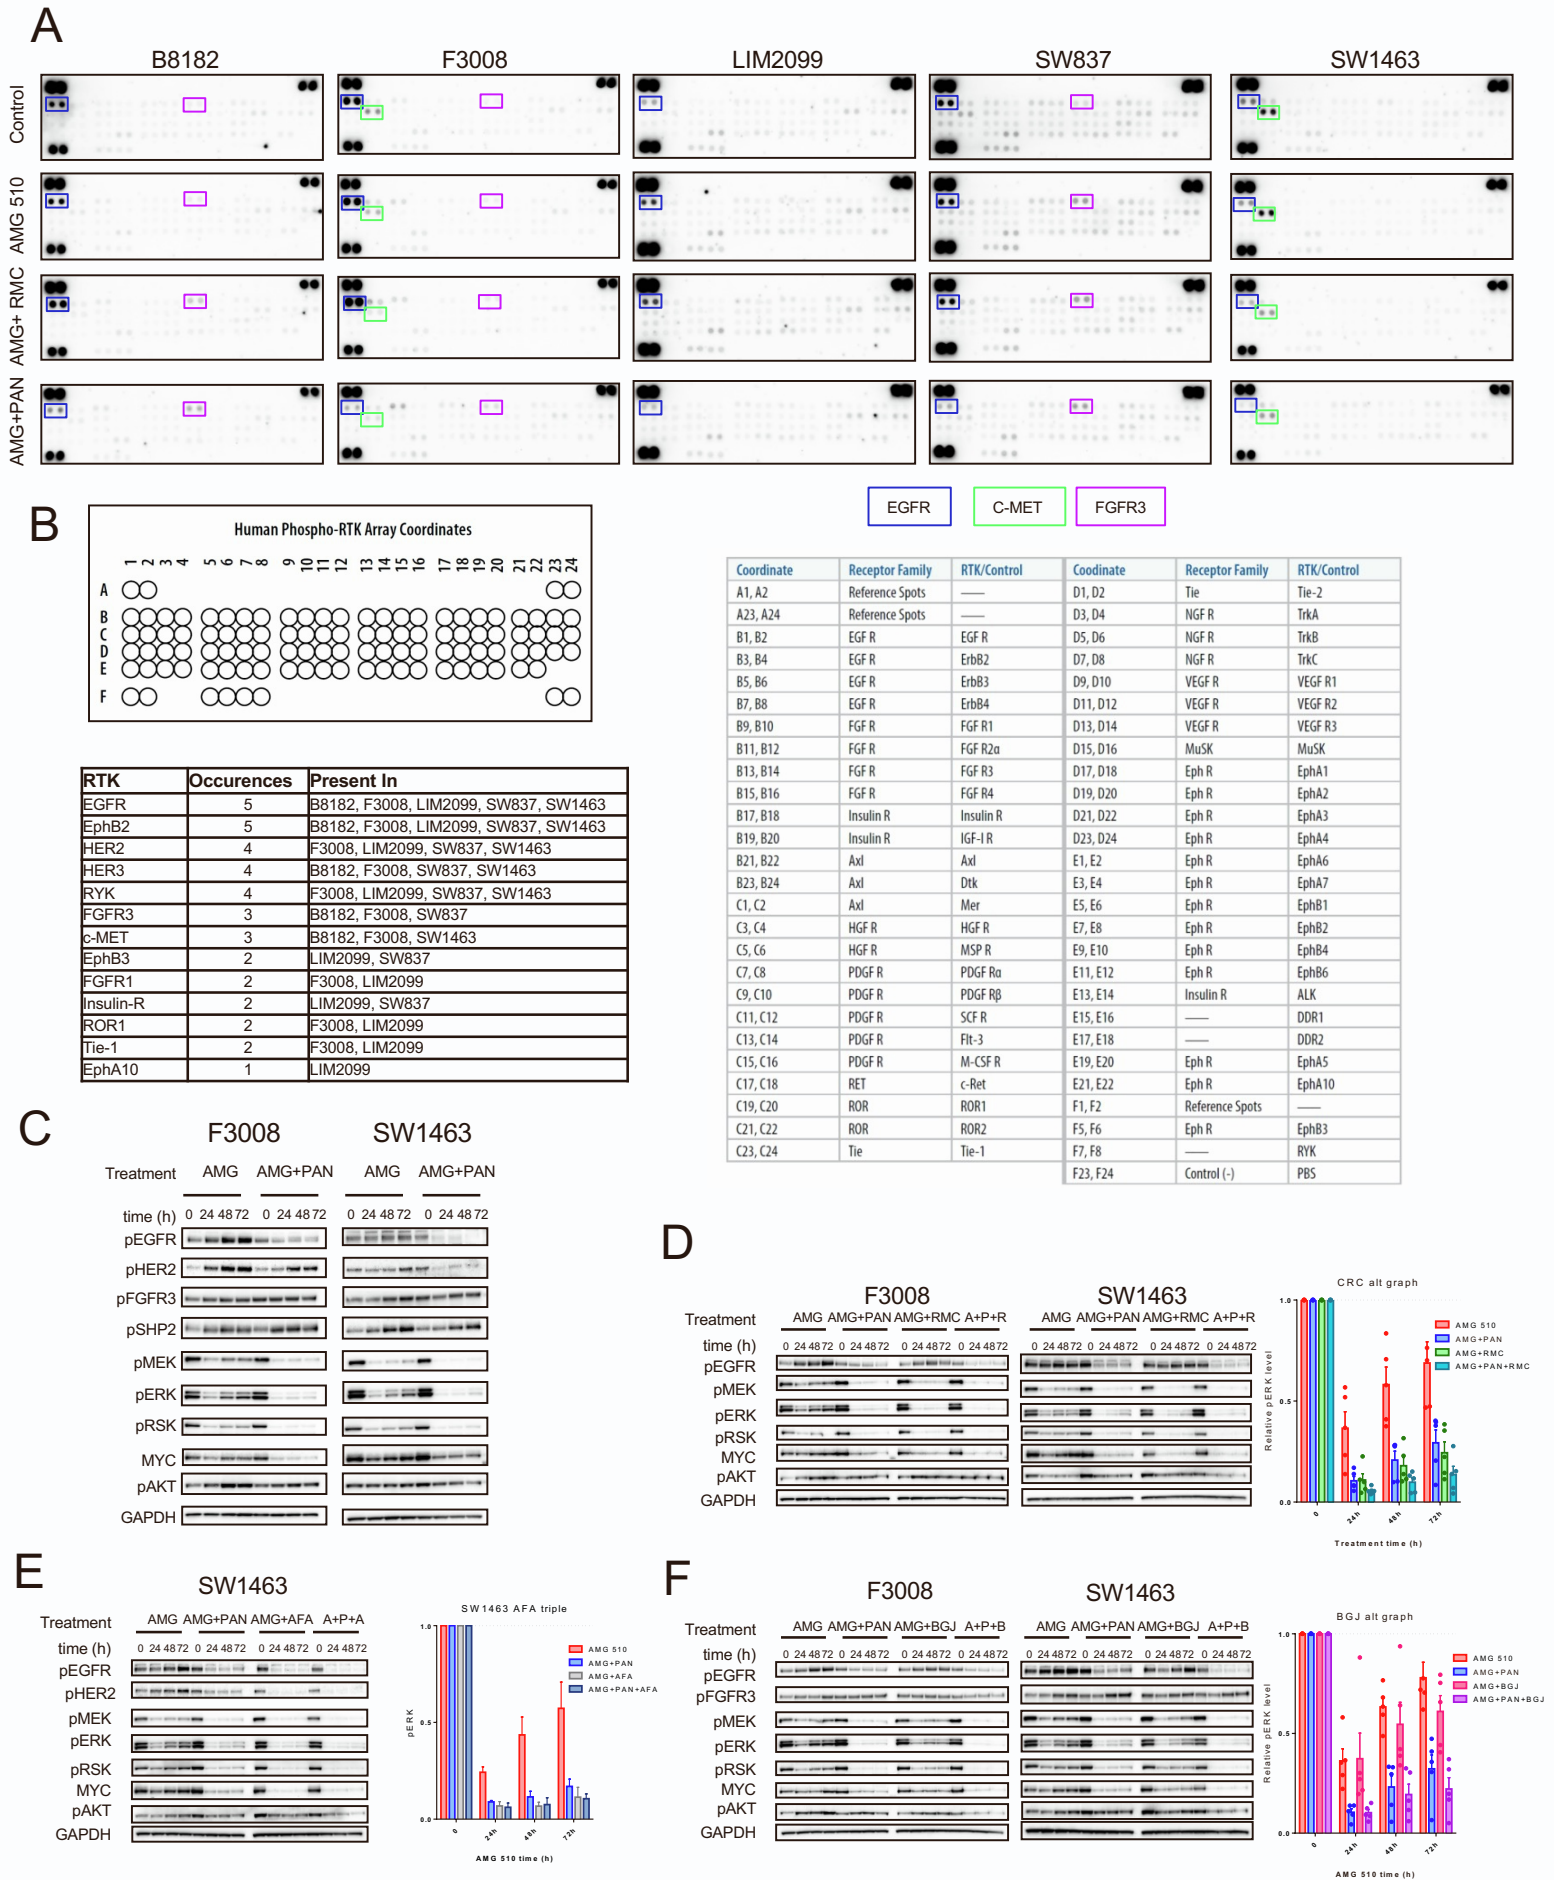



**Supplemental Figure 5 KRAS<sup>G12C</sup>-mutant CRC models demonstrate RTK heterogeneity that limits the efficacy of KRAS<sup>G12C</sup>**

**inhibition, related to Figure 5** (A, B) RTK array expression analysis of CRC cell lines treated with AMG 510 alone or in combination with panitumumab or RMC-4550 for 72 h (C) F3008 and SW1463 cell lines were treated with AMG 510 alone or in combination with panitumumab for 24, 48, or 72, Blot analysis was performed for phospho- (p)EGFR, HER2, FGFR3, SHP2, MEK, pERK, pRSK, pAKT, and total MYC with GAPDH as a loading control (D, F) F3008 and SW1463 cell lines were treated with AMG 510 alone or in combination with panitumumab or RMC-4550 and combined densitometry analysis was performed for pERK normalized to GAPDH for all 5 CRC cell lines in Fig 5 and Fig S5 (E) SW1463 cell lines were treated with AMG 510 alone or in combination with panitumumab or the pan-HER inhibitor afatinib and densitometry analysis was performed for pERK normalized to GAPDH
